# Supplementary material
Source: Springer Nature journal article supplement (https://www.springermedizin.de/resource/supplementary/12990_2009_231_MOESM9_ESM.pdf/9612846)

**A**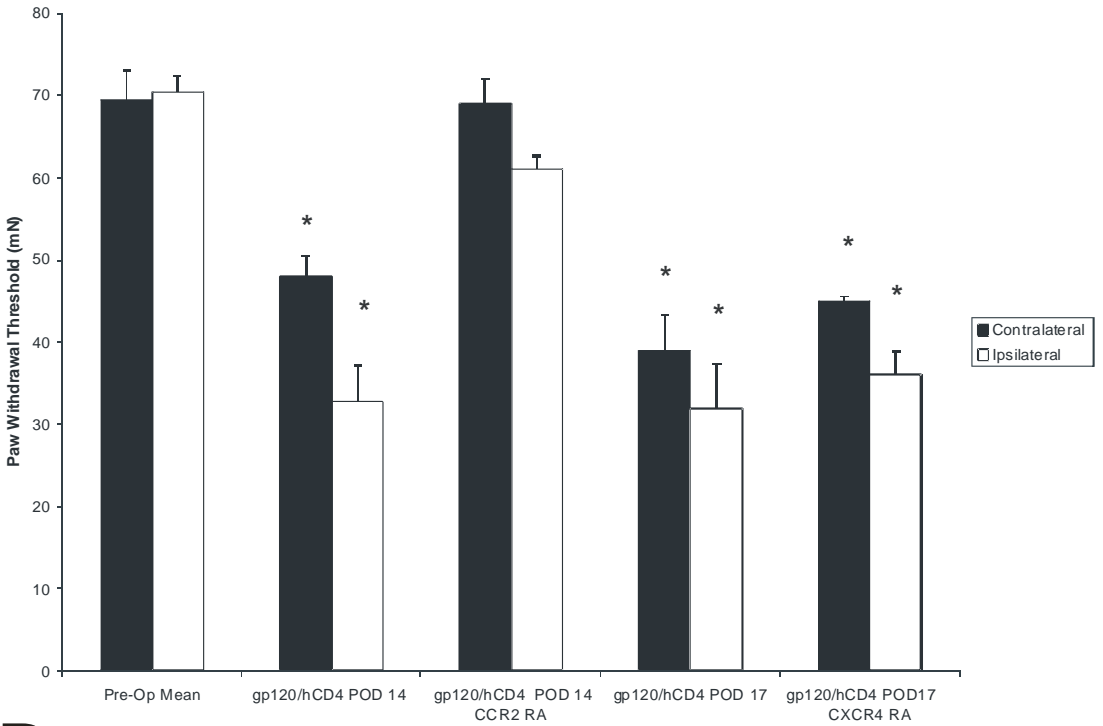**B**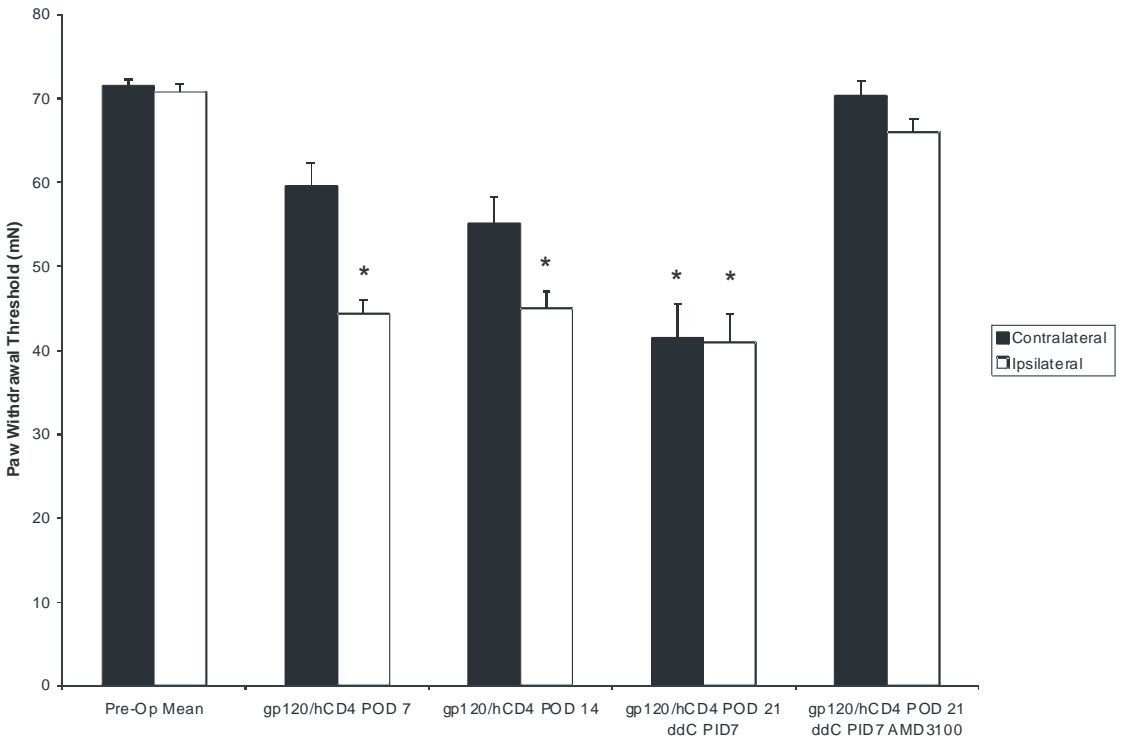

Supplement: MOESM9 [file 9612846]
